# Supplementary material for: Ca2+ permeation through C-terminal cleaved, but not full-length human Pannexin1 hemichannels, mediates cell death
Source: PubMed Central journal article supplement — Proc Natl Acad Sci U S A. 2024 Jun 11;121(25):e2405468121. doi: 10.1073/pnas.2405468121 (PMC11194574; doi:10.1073/pnas.2405468121), 2024-06-11
Supplement: pnas.2405468121.sapp.pdf [file pnas.2405468121.sapp.pdf]

## **Supporting Information for Ca<sup>2+</sup> permeation through C-terminal cleaved, but not full-length human Pannexin1 hemichannels, mediates cell death.**

Magdiel Salgado, Valeria Márquez-Miranda, Luciano Ferrada, Maximiliano Rojas, Gonzalo Poblete-Flores, Fernando D. González-Nilo, Álvaro O. Ardiles, and Juan C. Sáez.

Corresponding authors: Magdiel Salgado, Fernando D. Gonzalez-Nilo, and Juan C. Sáez.  
To whom correspondence may be addressed. Email: [magdiel.salgado@cinv.cl](mailto:magdiel.salgado@cinv.cl),  
[fernando.gonzalez@unab.cl](mailto:fernando.gonzalez@unab.cl), or [juancarlos.saez@uv.cl](mailto:juancarlos.saez@uv.cl)

### **This PDF file includes:**

Figures S1 to S7  
Supporting text

## Supporting Figures

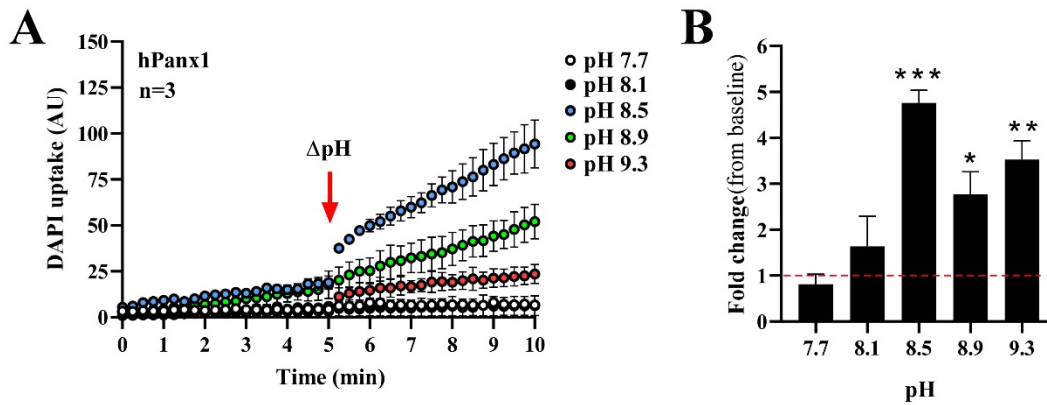

**Figure S1. hPanx1 HCs present maximal activity upon exposure to pH 8.5.** **A.** DAPI uptake recording in hPanx1-transfectant cells upon application of different mild alkaline buffers (pH 7.7 – 9.3), after basal incubation with Krebs-Ringer solution pH 7.4 (0-5 min). **B.** Fold change of DAPI uptake rate in response to alkaline buffer compared to basal condition (pH 7.4). n=3. Data represent mean  $\pm$  SEM. \*  $p \leq 0.05$ ; \*\*  $p \leq 0.01$ , \*\*\*  $p \leq 0.001$ .

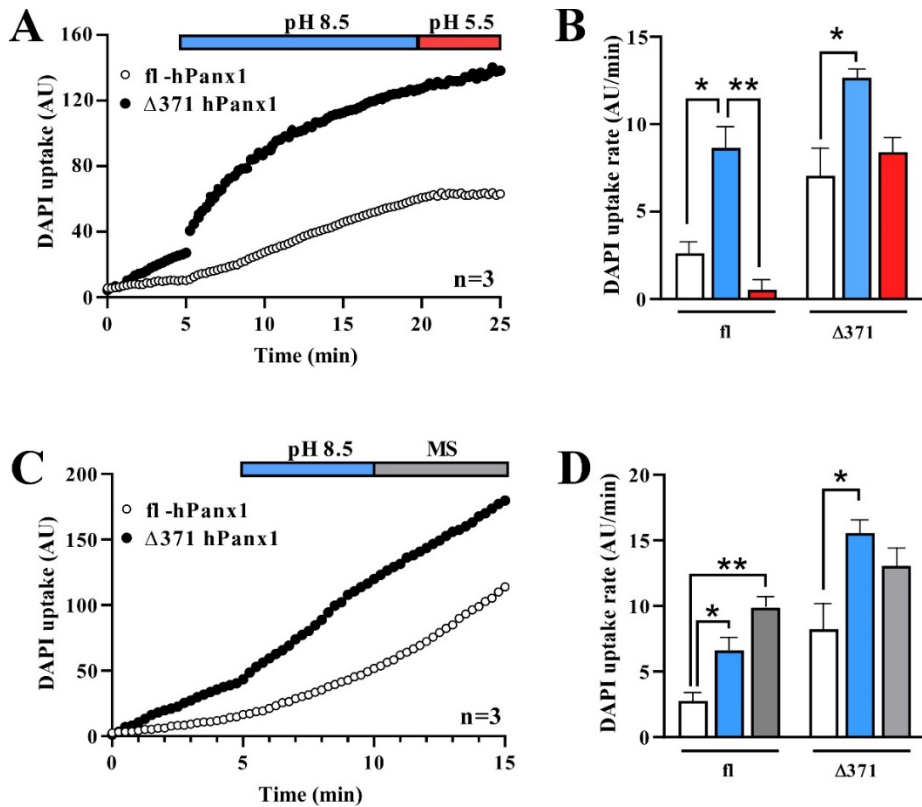

**Figure S2.  $\Delta 371$ hPanx1 HCs lack the acidic and stretch sensitivity present in fl-hPanx1 HCs.**

**A-B.** While the activity of hPanx1 is oppositely modulated by alkaline or acidic pH, truncated hPanx1 does not significantly respond to acidic pH. n=3. **C-D.** In fl-hPanx1 a significant increase in DAPI uptake rate was observed when mechanical stretch was applied after alkaline pH, whereas no changes were observed in  $\Delta 371$ hPanx1. n=3. Data represent mean  $\pm$  SEM. \*  $p \leq 0.05$ ; \*\*  $p \leq 0.01$ .

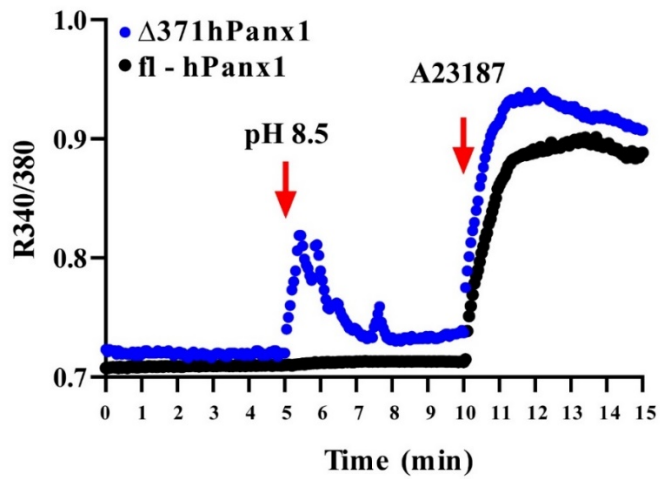

**Figure S3.  $\Delta 371hPax1$  expression allows a rapid but transient increase in Fura-2 signal upon exposure to pH 8.5.** *Cx45<sup>-/-</sup>/Panx1<sup>-/-</sup>* HeLa parental cells were transfected with fl-hPax1 or  $\Delta 371hPax1$  vector and then assayed for cytoplasmic  $Ca^{2+}$  signal in Fura-2 loaded cells. Only in  $\Delta 371hPax1$  transfectants, alkaline pH evokes a transient increase in Fura-2 signal, whereas both transfectants respond to calcium ionophore application. N=3.

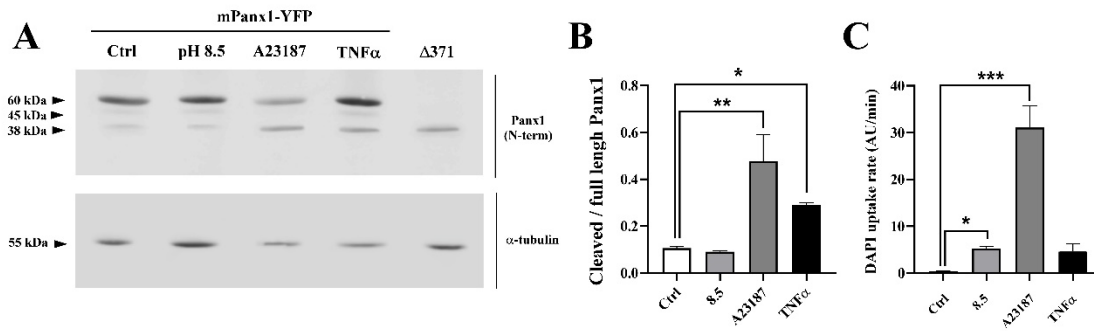

**Figure S4. mPanx1 hemichannels show a similar cleavage pattern as compared to hPanx1 hemichannels.** **A.** HeLa cells stably expressing mPanx1 were incubated 4 h with Krebs pH 8.5 (lane 2), 5  $\mu$ M A23187 (lane 3) or 50  $\mu$ g/mL TNF- $\alpha$  (lane 4). Other cells were 48 h-transfected with  $\Delta$ 371hPanx1 vector, and proteins were extracted and loaded for Western blot analysis (lane 5). **B.** Densitometric analysis was performed and truncated/full-length mPanx1 was plotted for each condition. n=3. **C.** DAPI uptake rates under each treatment. n=3. Data represent mean  $\pm$  SEM. \* p  $\leq$  0.05; \*\* p  $\leq$  0.01, \*\*\* p  $\leq$  0.001.

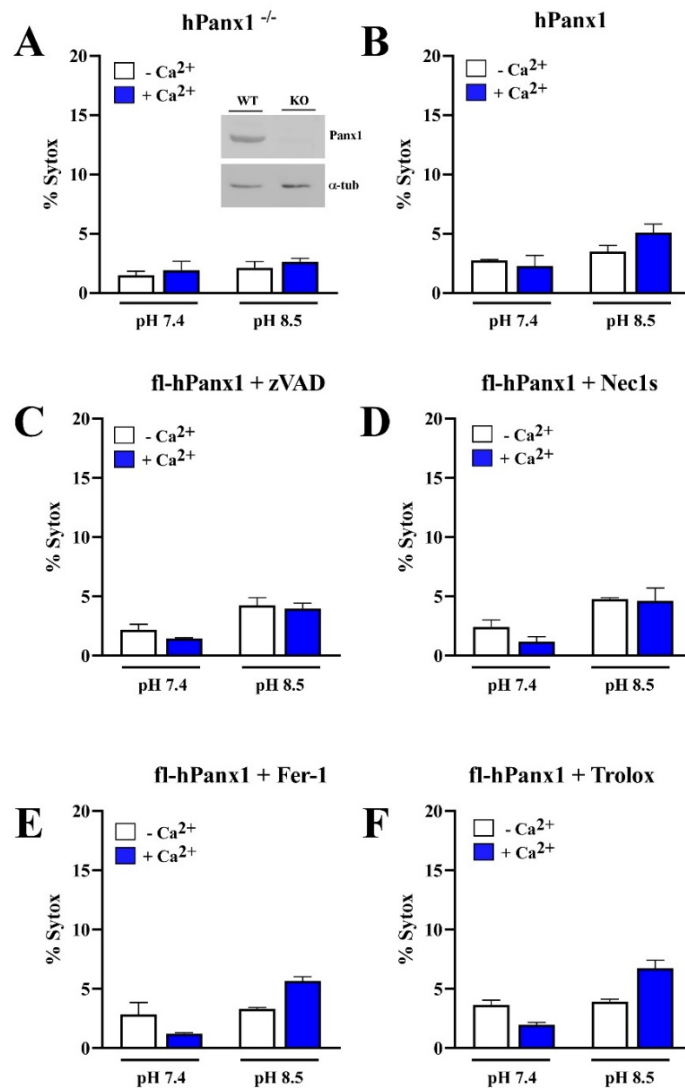

**Figure S5. Viability was not affected in fl-hPanx1 HeLa cells upon treatment with cell death inhibitors.** Cell death was assayed by Sytox staining in hPanx1<sup>-/-</sup> (A) and hPanx1 HeLa cells (B-F) upon exposure to saline solution pH 7.4 or 8.5 and in the presence or absence (B) of different inhibitors, such as zVAD-fmk (C), Nec1s (D), Fer-1 (E) or Trolox (F). n=3. Data represent mean  $\pm$  SEM. No significant differences were obtained between pH or Ca<sup>2+</sup> changes for each treatment.

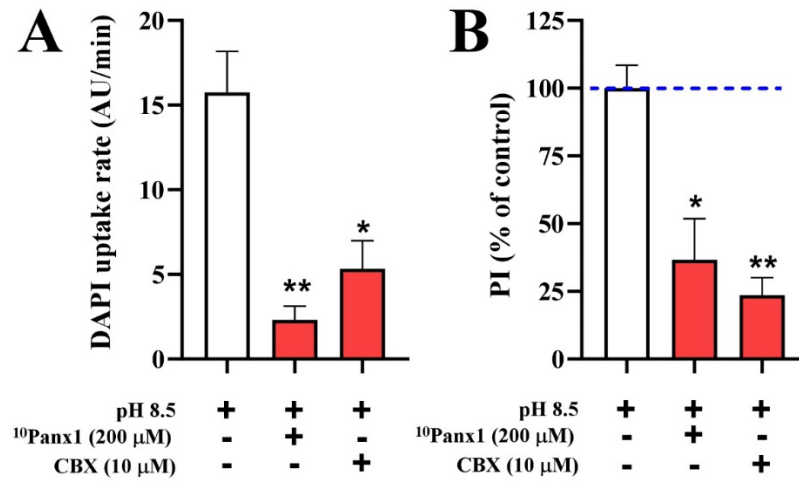

**Figure S6. Cell death was dramatically inhibited upon hemichannel inhibition. A.** DAPI uptake rate from HeLa- $\Delta$ 371hPanic1 cells stimulated with alkaline pH (8.5) and then assayed with hPanic1 HC inhibitors, carbenoxolone (CBX) or <sup>10</sup>Panic1. n=3. **B.** PI staining (% of control) in  $\Delta$ 371hPanic1 transfectant cells upon 4 h alkaline pH application in the presence of Panic1 HC inhibitors. n=3. Data represent mean  $\pm$  SEM. \* p  $\leq$  0.05; \*\* p  $\leq$  0.01.

## A23187 TREATMENT

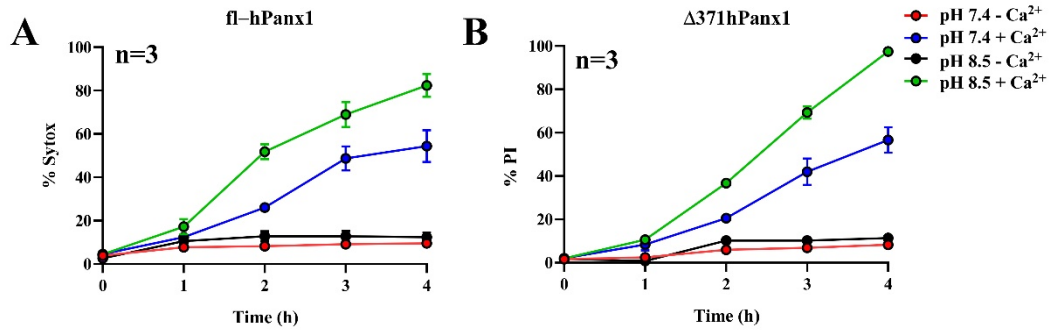

**Figure S7.  $\text{Ca}^{2+}$  ionophore application causes cell death bypassing Panx1 hemichannels. A.** HeLa cells transfected with fl-hPanx1 were incubated with 5  $\mu\text{M}$  A23187  $\text{Ca}^{2+}$  ionophore and Sytox staining was increased only in the presence of extracellular  $\text{Ca}^{2+}$ . **B.** Similarly, the application of A23187 only caused a significant increase in PI staining in cells incubated in a solution containing 3 mM  $\text{Ca}^{2+}$ , regardless of the extracellular pH. n=3. Data represent mean  $\pm$  SEM.



## **Supporting Text: Extended Methods**

### **Reagents**

Ethidium (Etd<sup>+</sup>) bromide, propidium iodide, sodium orthovanadate, TNF- $\alpha$ , xestospongine C and carbenoxolone (CBX) were purchased from Sigma-Aldrich (St. Louis, Missouri, USA). Turbofect, 4',6-diamidino-2-phenylindole (DAPI), and FURA-2 AM were obtained from Invitrogen / Thermo Fisher Scientific (Waltham, Massachusetts, USA). Sytox green, CellRox deep red, Ferrostatin, Nec1s, Trolox, and zVAD-fmk were from MedChemExpress (Deerpark, NJ, USA).
